# Supplementary material for: Ki MoSys: a web-based repository of experimental data for KInetic MOdels of biological SYStems
Source: Springer Nature journal article supplement (doi:10.1186/s12918-014-0085-3), 2014-08-12
Supplement: 12918_2014_85_MOESM1_ESM.pdf [file 12918_2014_85_MOESM1_ESM.pdf]

**Table 1. Data and associated models available in KiMoSys repository.**

| <b>Data EntryID</b> | <b>Organism</b>                   | <b>Type of data</b>             | <b>Original Publication Title</b>                                                                                                                                                 | <b>Reference</b> | <b>Reference of associated model(s)</b> |
|---------------------|-----------------------------------|---------------------------------|-----------------------------------------------------------------------------------------------------------------------------------------------------------------------------------|------------------|-----------------------------------------|
| 30                  | <i>Escherichia coli</i>           | time-series data of metabolites | Dynamic modeling of the central carbon metabolism of <i>Escherichia coli</i> .                                                                                                    | [1]              | [1]                                     |
| 35                  | <i>Escherichia coli</i>           | flux measurements               | Multiple high-throughput analyses monitor the response of <i>E. coli</i> perturbations.                                                                                           | [2]              | -                                       |
| 37                  | <i>Lactococcus lactis</i>         | time-series data of metabolites | Is the glycolytic flux in <i>Lactococcus lactis</i> primarily controlled by the redox charge? Kinetics of NAD(+) and NADH pools determined <i>in vivo</i> by <sup>13</sup> C NMR. | [3]              | [4,5]                                   |
| 38                  | <i>Escherichia coli</i>           | time-series data of metabolites | Modeling and simulation of the main metabolism in <i>Escherichia coli</i> and its several single-gene knockout mutants with experimental verification                             | [6]              | [6]                                     |
| 41                  | <i>Escherichia coli</i>           | metabolites at steady-state     | Multiple high-throughput analyses monitor the response of <i>E. coli</i> perturbations.                                                                                           | [2]              | -                                       |
| 42                  | <i>Clostridium acetobutylicum</i> | time-series data of metabolites | A systems biology approach to investigate the effect of pH-induced gene regulation on solvent production by <i>Clostridium acetobutylicum</i> in continuous culture.              | [7]              | [7]                                     |
| 44                  | <i>Escherichia coli</i>           | enzyme/protein concentrations   | Multiple high-throughput analyses monitor the response of <i>E. coli</i> perturbations                                                                                            | [2]              | -                                       |
| 51                  | <i>Escherichia coli</i>           | time-series data of metabolites | Dynamic simulation of an <i>in vitro</i> multi-enzyme system.                                                                                                                     | [8]              | -                                       |
| 52                  | <i>Escherichia coli</i>           | metabolites at steady-state     | Metabolic profiling of <i>Escherichia coli</i> cultivation: evaluation of extraction and metabolite analysis procedures.                                                          | [9]              | -                                       |
| 54                  | <i>Escherichia coli</i>           | metabolites at steady-state     | Quantification of intracellular metabolites in <i>Escherichia coli</i> K12 using liquid chromatographic-electrospray ionization tandem mass spectrometric technique.              | [10]             | -                                       |
| 55                  | <i>Pichia pastoris</i>            | metabolites at steady-state     | Glucose-methanol co-utilization in <i>Pichia pastoris</i> studied by metabolomics and instationary <sup>13</sup> C flux analysis.                                                 | [11]             | -                                       |
| 57                  | <i>Pichia pastoris</i>            | flux measurements               | Glucose-methanol co-utilization in <i>Pichia pastoris</i> studied by metabolomics and instationary <sup>13</sup> C flux analysis.                                                 | [11]             | -                                       |
| 58                  | <i>Homo sapiens</i>               | metabolites at steady-state     | Dynamics and control of the central carbon metabolism in Hepatoma cells.                                                                                                          | [12]             | -                                       |

(continued from previous page)

| Data EntryID | Organism                        | Type of data                    | Publication Title                                                                                                                                                                                | Reference | Reference of associated model(s) |
|--------------|---------------------------------|---------------------------------|--------------------------------------------------------------------------------------------------------------------------------------------------------------------------------------------------|-----------|----------------------------------|
| 59           | <i>Rattus</i>                   | time-series data of metabolites | The selective control of glycolysis, gluconeogenesis and glycogenesis by temporal insulin patterns.                                                                                              | [13]      | -                                |
| 61 and 62    | <i>Saccharomyces cerevisiae</i> | time-series data of metabolites | Temporal system-level organization of the switch from glycolytic to gluconeogenic operation in yeast.                                                                                            | [14]      | -                                |
| 63           | <i>Escherichia coli</i>         | time-series data of metabolites | Metabolomics-driven quantitative analysis of ammonia assimilation in <i>E. coli</i> .                                                                                                            | [15]      | [15]                             |
| 64           | <i>Escherichia coli</i>         | flux measurements               | Impact of global transcriptional regulation by <i>arcA</i> , <i>arcB</i> , <i>cra</i> , <i>crp</i> , <i>cya</i> , <i>fnr</i> , and <i>mlc</i> on glucose catabolism in <i>Escherichia coli</i> . | [16]      | -                                |
| 65           | <i>Escherichia coli</i>         | flux measurements               | Nonlinear dependency of intracellular fluxes on growth rate in miniaturized continuous cultures of <i>Escherichia coli</i> .                                                                     | [17]      | -                                |
| 66           | <i>Shewanella oneidensis</i>    | flux measurements               | Invariability of central metabolic flux distributions in <i>Shewanella oneidensis</i> MR-1 under environmental or genetic perturbation                                                           | [18]      | -                                |
| 67 and 68    | <i>Escherichia coli</i>         | flux measurements               | An integrated computational and experimental study for overproducing fatty acids in <i>Escherichia coli</i> .                                                                                    | [19]      | -                                |
| 69 and 70    | <i>Saccharomyces cerevisiae</i> | time-series data of metabolites | Characterization of glucose transport mutants of <i>Saccharomyces cerevisiae</i> during a nutritional upshift reveals a correlation between metabolite levels and glycolytic flux.               | [20]      | [20]                             |
| 71           | <i>Penicillium chrysogenum</i>  | time-series data of metabolites | Generating short-term kinetic responses of primary metabolism of <i>Penicillium chrysogenum</i> through glucose perturbation in the bioscope mini reactor.                                       | [21]      | -                                |
| 72           | <i>Aspergillus niger</i>        | flux measurements               | Integration of in vivo and in silico metabolic fluxes for improvement of recombinant protein production.                                                                                         | [22]      | -                                |
| 73           | <i>Aspergillus niger</i>        | flux measurements               | Overexpression of isocitrate lyase-glyoxylate bypass influence on metabolism in <i>Aspergillus niger</i> .                                                                                       | [23]      | -                                |
| 74           | <i>Escherichia coli</i>         | metabolites at steady-state     | Catching prompt metabolite dynamics in <i>Escherichia coli</i> with the BioScope at oxygen rich conditions.                                                                                      | [24]      | -                                |
| 75           | <i>Escherichia coli</i>         | time-series data of metabolites | Changes in substrate availability in <i>Escherichia coli</i> lead to rapid metabolite, flux and growth rate response.                                                                            | [25]      | -                                |
| 76           | <i>Streptomyces coelicolor</i>  | time-series data of metabolites | Intracellular metabolite pool changes in response to nutrient depletion induced metabolic switching in <i>Streptomyces coelicolor</i> .                                                          | [26]      | -                                |

(continued from previous page)

| Data EntryID | Organism                     | Type of data                    | Publication Title                                                                                                                                 | Reference | Reference of associated model(s) |
|--------------|------------------------------|---------------------------------|---------------------------------------------------------------------------------------------------------------------------------------------------|-----------|----------------------------------|
| 77           | <i>Shewanella oneidensis</i> | time-series data of metabolites | Integrating flux balance analysis into kinetic models to decipher the dynamic metabolism of <i>Shewanella oneidensis</i> .                        | [27]      | [27]                             |
| 78           | <i>Escherichia coli</i>      | time-series data of metabolites | Metabolic flux analysis in a nonstationary system: fed-batch fermentations of a high yielding strain of <i>E. coli</i> producing 1,3-propanediol. | [28]      | -                                |
| 79           | <i>Escherichia coli</i>      | metabolites at steady-state     | Metabolic regulation analysis of wild-type and arcA mutant <i>Escherichia coli</i> under nitrate conditions using different levels of omics data. | [29]      | -                                |
| 80           | <i>Escherichia coli</i>      | flux measurements               | Metabolic regulation analysis of wild-type and arcA mutant <i>Escherichia coli</i> under nitrate conditions using different levels of omics data. | [29]      | -                                |
| 81           | <i>Mouse</i>                 | enzyme/protein concentrations   | Division of labor by dual feedback regulators controls JAK2/STAT5 signaling over broad ligand range.                                              | [30]      | [30]                             |
| 82           | <i>Homo sapiens</i>          | enzyme/protein concentrations   | Network quantification of EGFR signaling unveils potential for targeted combination therapy.                                                      | [31]      | -                                |

Data EntryID: internal accession identifier.

Data EntryID without associated models is indicated by “-”.

### Reference List

1. Chassagnole C, Noisommit-Rizzi N, Schmid JW, Mauch K, Reuss M: **Dynamic modeling of the central carbon metabolism of *Escherichia coli***. *Biotechnology and Bioengineering* 2002, **79**: 53-73.
2. Ishii N, et.al.: **Multiple high-throughput analyses monitor the response of *E. coli* to perturbations**. *Science* 2007, **316**: 593-597.
3. Neves AR, Ventura R, Mansour N, Shearman C, Gasson MJ, Maycock C *et al.*: **Is the glycolytic flux in *Lactococcus lactis* primarily controlled by the redox charge? Kinetics of NAD(+) and NADH pools determined in vivo by C-13 NMR**. *Journal of Biological Chemistry* 2002, **277**: 28088-28098.

4. Levering J, Musters MWJM, Bekker M, Bellomo D, Fiedler T, de Vos WM *et al.*: **Role of phosphate in the central metabolism of two lactic acid bacteria - a comparative systems biology approach.** *FEBS J* 2012, **279**: 1274-1290.
5. Vinga S, Neves AR, Santos H, Brandt BW, Kooijman SALM: **Subcellular metabolic organization in the context of dynamic energy budget and biochemical systems theories.** *Philosophical Transactions of the Royal Society B-Biological Sciences* 2010, **365**: 3429-3442.
6. Kadir TAA, Mannan AA, Kierzek AM, McFadden J, Shimizu K: **Modeling and simulation of the main metabolism in *Escherichia coli* and its several single-gene knockout mutants with experimental verification.** *Microbial Cell Factories* 2010, **9**: 88.
7. Haus S, Jabbari S, Millat T, Janssen H, Fischer RJ, Bahl H *et al.*: **A systems biology approach to investigate the effect of pH-induced gene regulation on solvent production by *Clostridium acetobutylicum* in continuous culture.** *Bmc Systems Biology* 2011, **5**.
8. Ishii N, Suga Y, Hagiya A, Watanabe H, Mori H, Yoshino M *et al.*: **Dynamic simulation of an *in vitro* multi-enzyme system.** *FEBS* 2007, **581**: 413-420.
9. Hiller J, Franco-Lara E, Weuster-Botz D: **Metabolic profiling of *Escherichia coli* cultivations: evaluation of extraction and metabolite analysis procedures.** *Biotechnology Letters* 2007, **29**: 1169-1178.
10. Buchholz A, Takors R, Wandrey C: **Quantification of intracellular metabolites in *E. coli* K12 using liquid chromatographic-electrospray ionization tandem mass spectrometric techniques.** *Analytical Biochemistry* 2001, **295**: 129-137.
11. Jorda J, Suarez C, Carnicer M, ten Pierick A, Heijnen JJ, van Gulik W *et al.*: **Glucose-methanol co-utilization in *Pichia pastoris* studied by metabolomics and instationary C-13 flux analysis.** *Bmc Systems Biology* 2013, **7**.
12. Maier K, Hofmann U, Reuss M, Mauch K: **Dynamics and control of the central carbon metabolism in hepatoma cells.** *BMC Systemes Biology* 2010, **4**: 54-82.
13. Noguchi R, Kubota H, Yugi K, Toyoshima Y, Komori Y, Soga T *et al.*: **The selective control of glycolysis, gluconeogenesis and glycogenesis by temporal insulin patterns.** *Molecular Systems Biology* 2013, **9**.
14. Zampar GG, Kummel A, Ewald J, Jol S, Niebel B, Picotti P *et al.*: **Temporal system-level organization of the switch from glycolytic to gluconeogenic operation in yeast.** *Molecular Systems Biology* 2013, **9**.

15. Yuan J, et al.: **Metabolomics-driven quantitative analysis of ammonia assimilation in *E. coli***. *Molecular Systems Biology* 2009, **5**.
16. Perrenoud A, Sauer U: **Impact of global transcriptional regulation by ArcA, ArcB, Cra, Crp, Cya, Fnr, and Mlc on glucose catabolism in *Escherichia coli***. *Journal of Bacteriology* 2005, **187**: 3171-3179.
17. Nanchen A, Schicker A, Sauer U: **Nonlinear dependency of intracellular fluxes on growth rate in miniaturized continuous cultures of *Escherichia coli***. *Applied and Environmental Microbiology* 2006, **72**: 1164-1172.
18. Tang YJ, Martin HG, Deutschbauer A, Huang R, Llorca X, Arkin A *et al.*: **Invariability of central metabolic flux distribution in *Shewanella oneidensis* MR-1 under environmental or genetic perturbations**. *Biotechnol Prog* 2009, **25**: 1254-1259.
19. Ranganathan S, Tee TW, Chowdhury A, Zomorodi AR, Yoon JM, Fu YF *et al.*: **An integrated computational and experimental study for overproducing fatty acids in *Escherichia coli***. *Metabolic Engineering* 2012, **14**: 687-704.
20. Bosch D, Johansson M, Ferndahl C, Franzen CJ, Larsson C, Gustafsson L: **Characterization of glucose transport mutants of *Saccharomyces cerevisiae* during a nutritional upshift reveals a correlation between metabolite levels and glycolytic flux**. *Fems Yeast Research* 2008, **8**: 10-25.
21. Nasution U, van Gulik WM, Proell A, van Winden WA, Heijnen JJ: **Generating short-term kinetic responses of primary metabolism of *Penicillium chrysogenum* through glucose perturbation in the bioscope mini reactor**. *Metabolic Engineering* 2006, **8**: 395-405.
22. Driouch H, Melzer G, Wittmann C: **Integration of in vivo and in silico metabolic fluxes for improvement of recombinant protein production**. *Metabolic Engineering* 2012, **14**: 47-58.
23. Meijer S, Otero J, Olivares R, Andersen MR, Olsson L, Nielsen J: **Overexpression of isocitrate lyase-glyoxylate bypass influence on metabolism in *Aspergillus niger***. *Metabolic Engineering* 2009, **11**: 107-116.
24. De Mey M, Taymaz-Nikerel H, Baart G, Waegeman H, Maertens J, Heijnen JJ *et al.*: **Catching prompt metabolite dynamics in *Escherichia coli* with the BioScope at oxygen rich conditions**. *Metabolic Engineering* 2010, **12**: 477-487.
25. Taymaz-Nikerel H, De Mey M, Baart G, Maertens J, Heijnen JJ, van Gulik W: **Changes in substrate availability in *Escherichia coli* lead to rapid metabolite, flux and growth rate responses**. *Metabolic Engineering* 2013, **16**: 115-129.

26. Wentzel A, Sletta H, Consortium S, Ellingsen TE, Bruheim P: **Intracellular metabolite pool changes in response to nutrient depletion induced metabolic switching in *Streptomyces coelicolor*.** *Metabolites* 2012, **2**: 178-194.
27. Feng X, Chen Y, Tang YJ: **Integrating flux balance analysis into kinetic models to decipher the dynamic metabolism of *Shewanella oneidensis* MR-1.** *PLOS Comput Biol* 2012, **8**: e1002376.
28. Antoniewicz MR, Kraynie DF, Laffend LA, Gonzalez-Lergier J, Kelleher JK, Stephanopoulos G: **Metabolic flux analysis in a nonstationary system: Fed-batch fermentation of a high yielding strain of *E. coli* producing 1,3-propanediol.** *Metabolic Engineering* 2007, **9**: 277-292.
29. Toya Y, Nakahigashi K, Tomita M, Shimizu K: **Metabolic regulation analysis of wild-type and *arcA* mutant *Escherichia coli* under nitrate conditions using different levels of omics data.** *Molecular Biosystems* 2012, **8**: 2593-2604.
30. Bachmann J, Raue A, Schilling M, Bohm ME, Kreutz C, Kaschek D *et al.*: **Division of labor by dual feedback regulators controls JAK2/STAT5 signaling over broad ligand range.** *Molecular Systems Biology* 2011, **7**.
31. Klinger B, Sieber A, Fritsche-Guenther R, Witzel F, Berry L, Schumacher D *et al.*: **Network quantification of EGFR signaling unveils potential for targeted combination therapy.** *Molecular Systems Biology* 2013, **9**.
